# Supplementary material for: Phylogeographical Analyses and Antibiotic Resistance Genes of Acinetobacter johnsonii Highlight Its Clinical Relevance
Source: PubMed Central journal article supplement (PMC7333577; doi:10.1128/msphere.00581-20), 2020-07-01

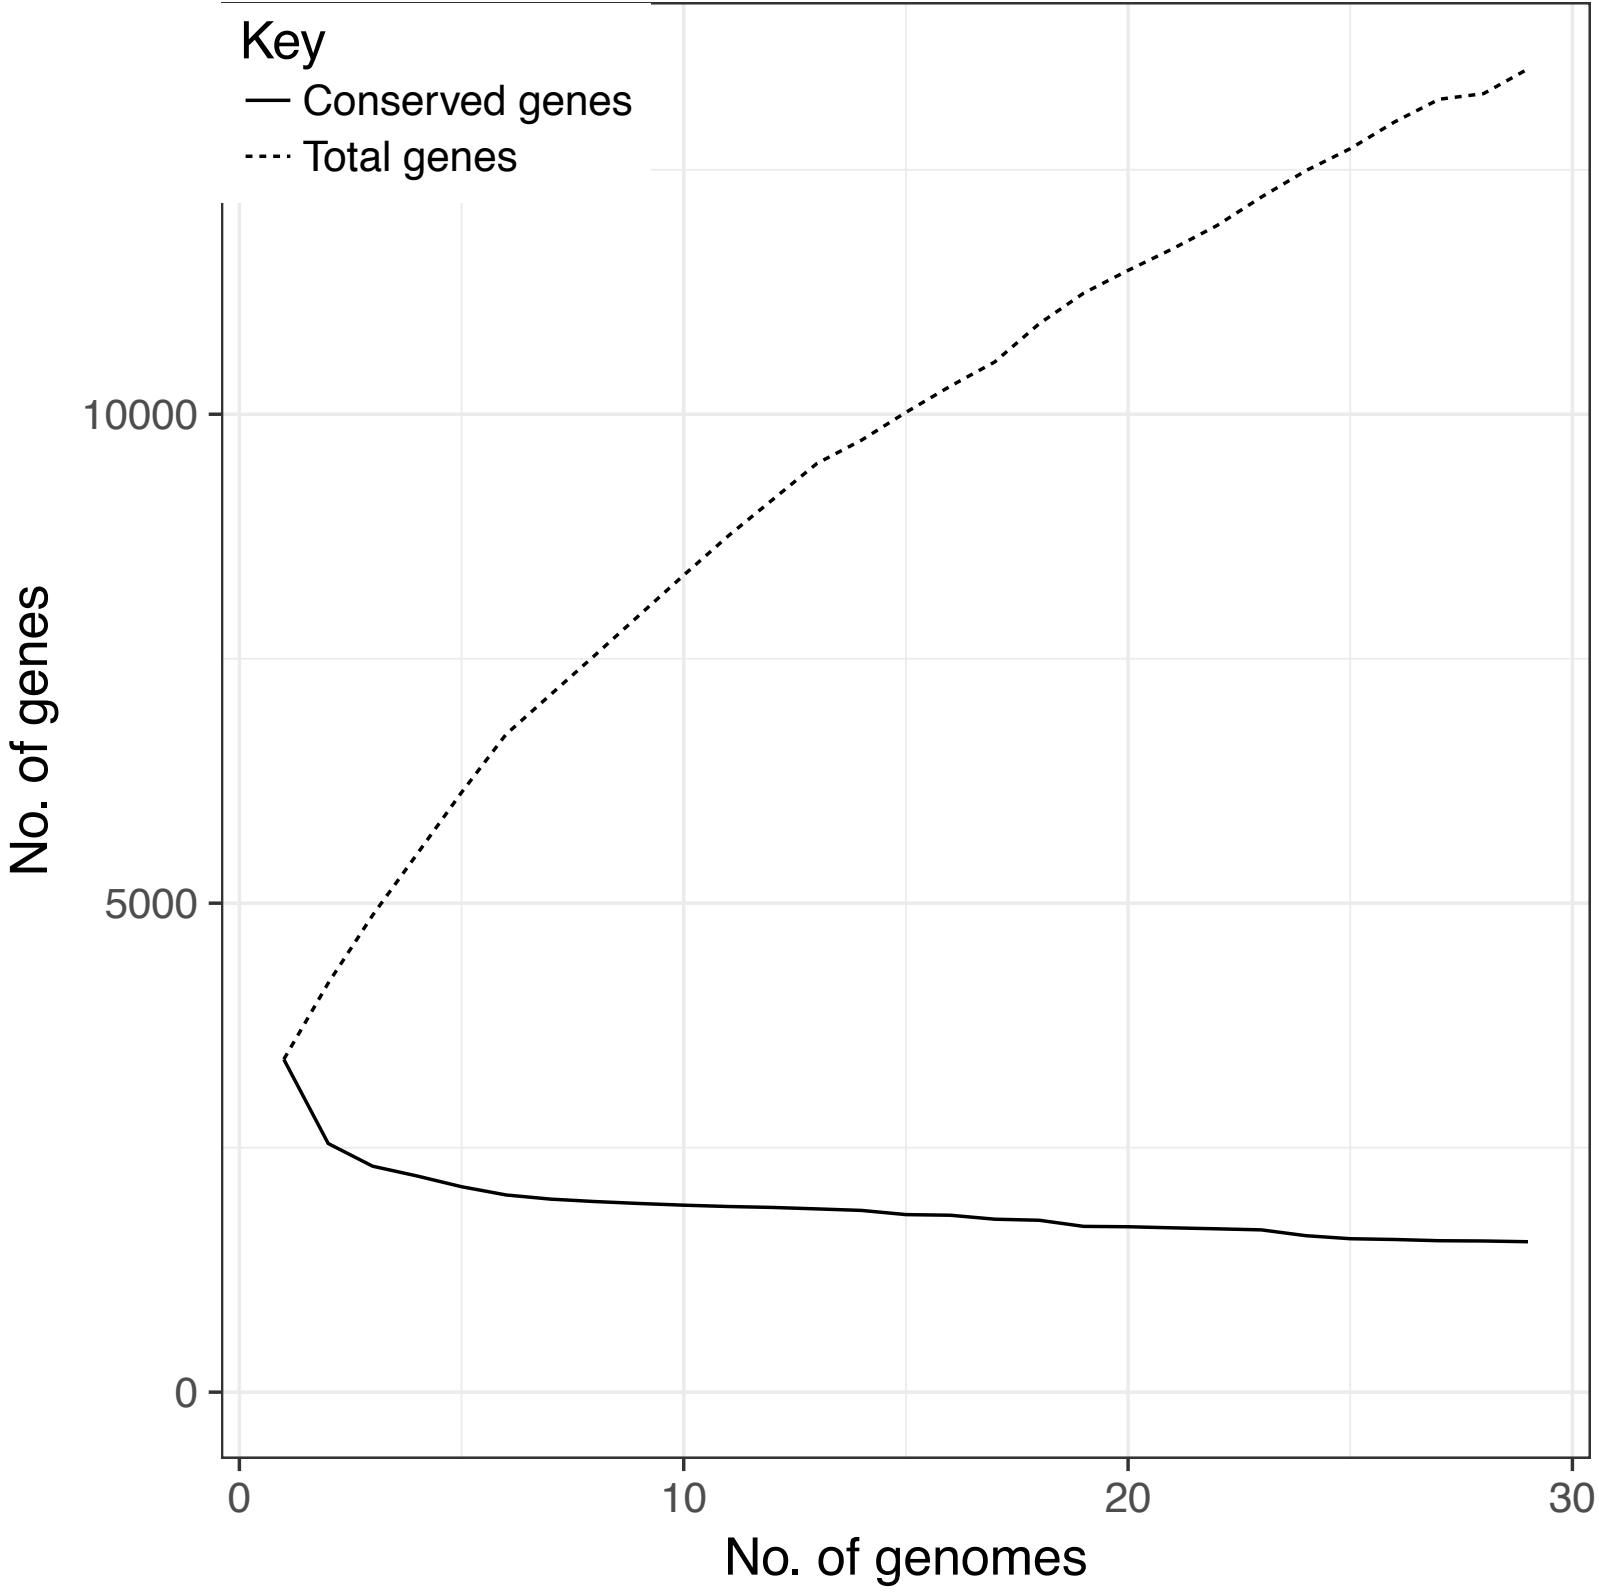

Supplement: mSphere.00581-20-sf001.pdf [file mSphere.00581-20-sf001.pdf]
